# Supplementary material for: Transmissible Effects of a Biochar Amendment to an Upper Soil Zone Upon an Associated Lower Zone, Including Attenuation of Soybean Cyst Nematode (Heterodera glycines)
Source: MDPI journal article supplement (doi:10.3390/agronomy13010053), 2022-12-23
Supplement: s1 [file s1]

**Supplementary Table 1.** The correlations of soil properties with the abundances of hatched *Heterodera glycines* J2, *Aphelenchus* and *Ecumenicus* based on the entire data along soil profile. Pearson's r value and p-value

| Soil properties    | r/p | <i>Heterodera</i> J2 | <i>Aphelenchus</i> | <i>Ecumenicus</i> |
|--------------------|-----|----------------------|--------------------|-------------------|
| Moisture           | r   | -0.1632              | -0.0767            | -0.0588           |
|                    | p   | p=0.342              | p=0.657            | p=0.734           |
| Sodium             | r   | -0.3290              | -0.1205            | -0.1633           |
|                    | p   | p=0.050              | p=0.484            | p=0.341           |
| Potassium          | r   | 0.0336               | -0.2034            | 0.5805            |
|                    | p   | p=0.846              | p=0.234            | p=0.000***        |
| Calcium            | r   | -0.3898              | -0.1805            | -0.3356           |
|                    | p   | p=0.019*             | p=0.292            | p=0.045*          |
| NH <sub>4</sub> -N | r   | -0.2692              | -0.1738            | -0.3605           |
|                    | p   | p=0.112              | p=0.311            | p=0.031*          |
| NO <sub>3</sub> -N | r   | -0.0419              | -0.0050            | -0.2703           |
|                    | p   | p=0.808              | p=0.977            | p=0.111           |

**Supplementary Table 2.** The correlations of soil properties with the density of the soybean cyst nematode (SCN) *Heterodera glycines* estimated with real-time PCR, abundance of hatched *Heterodera glycines* J2 or abundance of *Aphelenchus* and *Ecumenicus* in the lower layer soil. Pearson's r value and p-value

| Soil properties    | r/p | SCN density | <i>Heterodera</i> (J2) | <i>Aphelenchus</i> | <i>Ecumenicus</i> |
|--------------------|-----|-------------|------------------------|--------------------|-------------------|
| Moisture           | r   | 0.7730      | -0.6135                | -0.2332            | 0.6974            |
|                    | p   | p=0.015*    | p=0.079                | p=0.546            | p=0.037*          |
| Sodium             | r   | 0.4645      | -0.5527                | -0.0634            | 0.5334            |
|                    | p   | p=0.208     | p=0.123                | p=0.871            | p=0.139           |
| Potassium          | r   | 0.8474      | -0.3725                | -0.2582            | 0.6479            |
|                    | p   | p=0.004**   | p=0.324                | p=0.502            | p=0.059           |
| Calcium            | r   | 0.5127      | -0.5673                | -0.0734            | 0.6033            |
|                    | p   | p=0.158     | p=0.111                | p=0.851            | p=0.085           |
| Available P        | r   | 0.7690      | -0.5037                | -0.0418            | 0.5674            |
|                    | p   | p=0.015*    | p=0.167                | p=0.915            | p=0.111           |
| NH <sub>4</sub> -N | r   | 0.4954      | -0.3629                | 0.3504             | 0.1734            |
|                    | p   | p=0.175     | p=0.337                | p=0.355            | p=0.655           |
| NO <sub>3</sub> -N | r   | -0.0630     | -0.1226                | 0.0941             | 0.0736            |
|                    | p   | p=0.872     | p=0.753                | p=0.810            | p=0.851           |
| <i>Ecumenicus</i>  | r   | 0.8025      | -0.6146                |                    |                   |
|                    | p   | p=0.009**   | p=0.078                |                    |                   |
